# Supplementary material for: Machine learning identifies signatures of host adaptation in the bacterial pathogen Salmonella enterica
Source: PLoS Genet. 2018 May 8;14(5):e1007333. doi: 10.1371/journal.pgen.1007333 (PMC5940178; doi:10.1371/journal.pgen.1007333)
Supplement: S1 Table — (XLSX) [file pgen.1007333.s006.xlsx]

## Sheet: Supplemental_Table_S1
Accession	Serovar
Training strains
AE006468	Typhimurium LT2
CP001113	Newport SL254
CP001120	Heidelberg SL476
CP001127	Schwarzengrund CVM19633
CP001138	Agona SL483
AM933172	Enteritidis P125109
CP000886	Paratyphi B SPB7
AE014613	Typhi Ty2
FM200053	Paratyphi A AKU_12601
CP001144	Dublin CT_02021853
AM933173	Gallinarum 287/91
AE017220	Choleraesuis SC-B67
CP000857	Paratyphi C RKS4594
Validation strains
FQ312003	Typhimurium SL1344
CP007559.1	Newport CDC2010K-1259
CP016507	Heidelberg SH12_003
CP006876	Agona 24249
CP007507	Enteritidis Durban
AL513382	Typhi CT18
FM200053	Paratyphi A AKU 12601
CM001151	Dublin SD3246
CP003786	Gallinarum bv. Pullorum
CM001062	Choleraesuis A50
